# Supplementary material
Source: PubMed Central journal article supplement (PMC2724193)
Supplement: NIHMS110195-supplement-Appendix.pdf [file NIHMS110195-supplement-Appendix.pdf]

**Appendix Table: Additional Secondary Quality of Life Measures by Intention to Treat**

|                                     |        | <u>PCI</u>    | <u>MED</u>    | <u>Difference between<br/>PCI and MED<br/>(95% CI)</u> |
|-------------------------------------|--------|---------------|---------------|--------------------------------------------------------|
| <b>SF role function - emotional</b> |        |               |               |                                                        |
| Baseline                            | N      | 432           | 432           |                                                        |
|                                     | median | 100 (67, 100) | 100 (33, 100) |                                                        |
|                                     | mean   | 76.62±37.94   | 71.76±40.55   | 4.86 (-0.38, 10.11)                                    |
| 4 months                            | N      | 409           | 411           |                                                        |
|                                     | median | 100 (33, 100) | 100 (67, 100) |                                                        |
|                                     | mean   | 75.26±37.74   | 76.16±37.65   | -0.89 (-6.06, 4.28)                                    |
| 12 months                           | N      | 399           | 396           |                                                        |
|                                     | median | 100 (67,100)  | 100 (67,100)  |                                                        |
|                                     | mean   | 78.99±36.29   | 79.12±36.00   | -0.14 (-5.17, 4.90)                                    |
| 24 months                           | N      | 379           | 375           |                                                        |
|                                     | median | 100 (67,100)  | 100 (67,100)  |                                                        |
|                                     | mean   | 82.41±33.35   | 79.69±36.48   | 2.72 (-2.28, 7.72)                                     |
| <b>SF role function - physical</b>  |        |               |               |                                                        |
| Baseline                            | N      | 429           | 427           |                                                        |
|                                     | median | 50 (0,100)    | 75 (0,100)    |                                                        |
|                                     | mean   | 54.74±43.08   | 56.03±44.21   | -1.29 (-7.15, 4.57)                                    |
| 4 months                            | N      | 407           | 408           |                                                        |
|                                     | median | 75 (0,100)    | 75 (25,100)   |                                                        |
|                                     | mean   | 58.85±42.28   | 59.38±40.94   | -0.53 (-6.25, 5.19)                                    |
| 12 months                           | N      | 400           | 396           |                                                        |
|                                     | median | 100 (25,100)  | 100 (25,100)  |                                                        |
|                                     | mean   | 68.90±39.04   | 69.34±40.73   | -0.44 (-5.99, 5.11)                                    |
| 24 months                           | N      | 380           | 381           |                                                        |
|                                     | median | 100 (25,100)  | 100 (50,100)  |                                                        |
|                                     | mean   | 68.82±40.09   | 70.19±38.58   | -1.37 (-6.97, 4.23)                                    |
| <b>SF general health</b>            |        |               |               |                                                        |
| Baseline                            | N      | 443           | 443           |                                                        |
|                                     | median | 57 (50,62)    | 57 (50,65)    |                                                        |
|                                     | mean   | 56.25±11.06   | 56.86±11.25   | -0.62 (-2.09, 0.85)                                    |
| 4 months                            | N      | 410           | 416           |                                                        |
|                                     | median | 57 (50,62)    | 57 (50,62)    |                                                        |
|                                     | mean   | 55.49±9.67    | 55.41±10.51   | 0.08 (-1.30, 1.46)                                     |

|                              |        |              |              |                     |
|------------------------------|--------|--------------|--------------|---------------------|
| 12 months                    | N      | 409          | 404          |                     |
|                              | median | 57 (47,62)   | 57 (50,62)   |                     |
|                              | mean   | 54.75±10.26  | 55.52±9.49   | -0.77 (-2.13, 0.59) |
| 24 months                    | N      | 383          | 384          |                     |
|                              | median | 57 (50,62)   | 57 (50,62)   |                     |
|                              | mean   | 54.86±9.54   | 55.60±10.17  | -0.74 (-2.14, 0.66) |
| <b>SF vitality</b>           |        |              |              |                     |
| Baseline                     | N      | 442          | 446          |                     |
|                              | median | 60 (40,75)   | 58 (40,75)   |                     |
|                              | mean   | 56.83±23.66  | 55.92±24.09  | 0.92 (-2.23, 4.06)  |
| 4 months                     | N      | 414          | 420          |                     |
|                              | median | 60 (45,80)   | 60 (45,80)   |                     |
|                              | mean   | 59.45±23.38  | 58.19±23.23  | 1.27 (-1.90, 4.43)  |
| 12 months                    | N      | 408          | 406          |                     |
|                              | median | 60 (45,80)   | 65 (45,80)   |                     |
|                              | mean   | 59.73±21.37  | 60.30±23.05  | -0.57 (-3.63, 2.49) |
| 24 months                    | N      | 386          | 387          |                     |
|                              | median | 63 (50,80)   | 65 (45,80)   |                     |
|                              | mean   | 60.79±21.65  | 60.10±22.86  | 0.70 (-2.45, 3.84)  |
| <b>SF social functioning</b> |        |              |              |                     |
| Baseline                     | N      | 446          | 450          |                     |
|                              | median | 81 (50,100)  | 88 (50,100)  |                     |
|                              | mean   | 74.13±27.37  | 74.25±28.40  | -0.12 (-3.78, 3.54) |
| 4 months                     | N      | 416          | 420          |                     |
|                              | median | 94 (63,100)  | 88 (63,100)  |                     |
|                              | mean   | 81.07±24.31  | 79.85±25.35  | 1.22 (-2.15, 4.59)  |
| 12 months                    | N      | 410          | 406          |                     |
|                              | median | 100 (75,100) | 100 (75,100) |                     |
|                              | mean   | 84.60±21.28  | 83.53±23.39  | 1.08 (-2.00, 4.15)  |
| 24 months                    | N      | 388          | 389          |                     |
|                              | median | 100 (75,100) | 100 (75,100) |                     |
|                              | mean   | 84.66±21.68  | 83.23±22.82  | 1.44 (-1.70, 4.57)  |
| <b>SF pain index</b>         |        |              |              |                     |
| Baseline                     | N      | 447          | 449          |                     |
|                              | median | 62 (41,84)   | 62 (41,84)   |                     |
|                              | mean   | 61.74±26.85  | 60.55±28.30  | 1.19 (-2.42, 4.81)  |
| 4 months                     | N      | 414          | 420          |                     |
|                              | median | 74 (61,100)  | 74 (61,100)  |                     |
|                              | mean   | 73.58±24.60  | 73.88±24.36  | -0.29 (-3.62, 3.03) |
| 12 months                    | N      | 409          | 406          |                     |
|                              | median | 74 (52,100)  | 74 (61,100)  |                     |
|                              | mean   | 73.59±24.39  | 74.04±24.85  | -0.46 (-3.84, 2.93) |
| 24 months                    | N      | 388          | 390          |                     |

|  |        |             |             |                     |
|--|--------|-------------|-------------|---------------------|
|  | median | 74 (52,100) | 74 (61,100) |                     |
|  | mean   | 72.72±24.94 | 74.59±24.94 | -1.87 (-5.38, 1.64) |

**Bed days**

|           |      |           |           |                     |
|-----------|------|-----------|-----------|---------------------|
| Baseline  | N    | 422       | 428       |                     |
|           | mean | 1.45±4.26 | 1.76±5.17 | -0.31 (-0.95, 0.33) |
| 4 months  | N    | 397       | 402       |                     |
|           | mean | 0.83±3.24 | 0.95±3.60 | -0.12 (-0.60, 0.35) |
| 12 months | N    | 387       | 391       |                     |
|           | mean | 0.78±3.59 | 0.92±4.21 | -0.14 (-0.69, 0.42) |
| 24 months | N    | 365       | 368       |                     |
|           | mean | 0.98±4.24 | 0.76±3.51 | 0.22 (-0.34, 0.79)  |

**Disability days**

|           |      |            |            |                     |
|-----------|------|------------|------------|---------------------|
| Baseline  | N    | 422        | 424        |                     |
|           | mean | 5.59±10.28 | 5.62±10.46 | -0.03 (-1.42, 1.38) |
| 4 months  | N    | 394        | 394        |                     |
|           | mean | 5.07±11.03 | 4.81±10.99 | 0.26 (-1.28, 1.80)  |
| 12 months | N    | 383        | 388        |                     |
|           | mean | 2.68±7.50  | 2.95±8.35  | -0.27 (-1.39, 0.85) |
| 24 months | N    | 363        | 360        |                     |
|           | mean | 2.18±6.48  | 3.45±9.67  | -1.27 (-2.47, 0.07) |

**0-100 rating scale**

|           |        |             |             |                    |
|-----------|--------|-------------|-------------|--------------------|
| Baseline  | N      | 435         | 439         |                    |
|           | median | 80 (60,90)  | 76 (60,90)  |                    |
|           | mean   | 73.85±20.40 | 72.83±20.96 | 1.02 (-1.72, 3.77) |
| 4 months  | N      | 405         | 406         |                    |
|           | median | 80 (70,90)  | 80 (67,90)  |                    |
|           | mean   | 76.97±17.57 | 76.06±19.83 | 0.91 (-1.67, 3.49) |
| 12 months | N      | 399         | 402         |                    |
|           | median | 80 (70,90)  | 80 (70,90)  |                    |
|           | mean   | 78.08±17.35 | 77.94±18.23 | 0.14 (-2.33, 2.61) |
| 24 months | N      | 373         | 380         |                    |
|           | median | 80 (70,90)  | 80 (70,90)  |                    |
|           | mean   | 77.99±17.51 | 77.53±18.57 | 0.46 (-2.12, 3.05) |

**Time Trade-Off**

|           |        |               |               |                           |
|-----------|--------|---------------|---------------|---------------------------|
| Baseline  | N      | 413           | 410           |                           |
|           | median | 0.9 (0.6,1.0) | 1.0 (0.7,1.0) |                           |
|           | mean   | 0.72±0.37     | 0.75±0.36     | <b>-0.03 (-0.08,0.02)</b> |
| 4 months  | N      | 378           | 385           |                           |
|           | median | 1.0 (0.9,1.0) | 1.0 (0.8,1.0) |                           |
|           | mean   | 0.85±0.28     | 0.79±0.33     | <b>0.06 (0.01,0.10)</b>   |
| 12 months | N      | 378           | 368           |                           |
|           | median | 1.0 (0.9,1.0) | 1.0 (0.9,1.0) |                           |

|           |        |               |               |                   |
|-----------|--------|---------------|---------------|-------------------|
|           | mean   | 0.85±0.30     | 0.84±0.30     | 0.00 (-0.04,0.05) |
| 24 months | N      | 361           | 359           |                   |
|           | median | 1.0 (0.9,1.0) | 1.0 (0.9,1.0) |                   |
|           | mean   | 0.87±0.27     | 0.84±0.31     | 0.03 (-0.01,0.08) |

**Working full or part time**

|           |       |      |      |                    |
|-----------|-------|------|------|--------------------|
| Baseline  | N     | 447  | 442  |                    |
|           | % yes | 50.3 | 51.6 | -1.25 (-0.08,0.05) |
| 4 months  | N     | 418  | 424  |                    |
|           | % yes | 43.8 | 45.8 | -1.97 (-0.09,0.05) |
| 12 months | N     | 407  | 411  |                    |
|           | % yes | 44.0 | 46.7 | -2.73 (-0.10,0.04) |
| 24 months | N     | 389  | 386  |                    |
|           | % yes | 41.9 | 46.6 | -4.73 (-0.12,0.02) |

Continuous variables shown as medians (25<sup>th</sup> to 75<sup>th</sup> percentiles) and means with standard deviations. Categorical variables are shown as percentages.

95% confidence intervals on treatment differences calculated as PCI minus MED.  
 Comparisons with bolded values were statistically significant at a p≤ 0.05 level.
